# Supplementary material
Source: HighWire-hosted journal article supplement (https://cmajopen-stage.highwire.org/highwire/filestream/80843/field_highwire_adjunct_files/0/open-2015-0095-1-at.pdf)
Supplement: open-2015-0095-1-at.pdf [file open-2015-0095-1-at.pdf]

Appendix 1 (as supplied by the authors): Timing of Patent Expiry and Introduction of New Antipsychotic Products in Ontario, Canada

| Event                                   | Quarter |
|-----------------------------------------|---------|
| Risperidone patent expiry               | 2006-Q3 |
| Olanzapine patent expiry                | 2007-Q3 |
| Quetiapine patent expiry                | 2008-Q4 |
| Paliperidone marketed                   | 2009-Q3 |
| Olanzapine rapid dissolve patent expiry | 2010-Q1 |
| Quetiapine extended release marketed    | 2010-Q4 |
| Ziprasidone marketed                    | 2010-Q3 |
| Aripiprazole marketed                   | 2011-Q4 |
| Injectable paliperidone marketed        | 2012-Q1 |

| Legend               |
|----------------------|
| Patent Expiry        |
| New Agent Introduced |
